# Supplementary material for: Efficacy of PBTZ169 and pretomanid against Mycobacterium avium, Mycobacterium abscessus, Mycobacterium chelonae, and Mycobacterium fortuitum in BALB/c mice models
Source: PubMed Central journal article supplement (PMC10106926; doi:10.3389/fcimb.2023.1115530), 2023-03-22
Supplement: Table_1.pdf [file Table_1.pdf]

SUPPLEMENTARY TABLE 1 MICs of the drugs (or compounds) against clinical strains of NTM

| Mycobacterial species                                      |                  | MICs (µg/mL) |        |       |       |        |            |         |
|------------------------------------------------------------|------------------|--------------|--------|-------|-------|--------|------------|---------|
|                                                            |                  | CLR          | BDQ    | CFZ   | RFB   | MOFX   | Pretomanid | PBTZ169 |
| <i>M. avium</i>                                            | <i>Reference</i> | 3.27         | 0.21   | 0.82  | 0.07  | 0.19   | >32        | >32     |
|                                                            | <i>2—8</i>       | 2.21         | 0.04   | 1.67  | 0.11  | 0.95   | >32        | >32     |
|                                                            | <i>2—9</i>       | 3.53         | 0.05   | 1.96  | 0.10  | 0.90   | >32        | >32     |
|                                                            | <i>2—11</i>      | 3.86         | 0.16   | 1.88  | 0.10  | 0.92   | >32        | >32     |
|                                                            | <i>2—15</i>      | 3.84         | 0.03   | 1.95  | 0.04  | 0.88   | >32        | >32     |
|                                                            | <i>2—16</i>      | 3.41         | 0.07   | 1.90  | 0.96  | 3.34   | >32        | >32     |
|                                                            | <i>8—1</i>       | 5.38         | 0.11   | 3.74  | 0.11  | 0.65   | >32        | >32     |
|                                                            | <i>8—9</i>       | 30.65        | 0.47   | 0.82  | 0.47  | 0.97   | >32        | >32     |
|                                                            | <i>8—11</i>      | 3.56         | 0.03   | 1.73  | 0.08  | 2.95   | >32        | >32     |
|                                                            | <i>8—15</i>      | >32          | 0.03   | 3.20  | 0.17  | 5.87   | >32        | >32     |
| <i>M. abscessus</i><br><i>subsp.</i><br><i>abscessus</i>   | <i>Reference</i> | 2.76         | 0.46   | 6.91  | 3.91  | 6.00   | >32        | >32     |
|                                                            | <i>0021</i>      | 11.48        | 0.41   | 7.16  | 7.08  | 7.73   | >32        | >32     |
|                                                            | <i>0023</i>      | 6.13         | 0.46   | 2.43  | 5.74  | 9.07   | >32        | >32     |
|                                                            | <i>M-111</i>     | >32          | 3.11   | 13.64 | 14.51 | >32    | >32        | >32     |
|                                                            | <i>M-124</i>     | >32          | 2.84   | 13.22 | 4.71  | 29.00  | >32        | >32     |
|                                                            | <i>M-163</i>     | 6.09         | 0.90   | 7.93  | 6.38  | >32    | >32        | >32     |
|                                                            | <i>M-165</i>     | 1.98         | 1.94   | 14.41 | 3.86  | >32    | >32        | >32     |
|                                                            | <i>M-168</i>     | >32          | 3.82   | 14.19 | 7.78  | >32    | >32        | >32     |
|                                                            | <i>M-172</i>     | >32          | 0.95   | 7.82  | 7.75  | >32    | >32        | >32     |
|                                                            | <i>M-237</i>     | 1.57         | 3.80   | 14.94 | 14.72 | >32    | >32        | >32     |
|                                                            | <i>M-253</i>     | 7.91         | 1.22   | 14.51 | 3.78  | >32    | >32        | >32     |
|                                                            | <i>M-269</i>     | 29.92        | 2.78   | 15.10 | 14.90 | >32    | >32        | >32     |
|                                                            | <i>M-288</i>     | 6.65         | 1.84   | 14.65 | 7.09  | 29.91  | >32        | >32     |
|                                                            | <i>M-323</i>     | >32          | 1.74   | 14.94 | 3.91  | 15.49  | >32        | >32     |
|                                                            | <i>0019</i>      | 0.08         | 0.09   | 3.48  | 5.50  | 1.65   | >32        | >32     |
|                                                            | <i>0032</i>      | 0.08         | 0.10   | 5.08  | 7.38  | 2.01   | >32        | >32     |
|                                                            | <i>M-119</i>     | 1.11         | 0.57   | 6.91  | 6.33  | 20.28  | >32        | >32     |
| <i>M. abscessus</i><br><i>subsp.</i><br><i>massiliense</i> | <i>M-126</i>     | >32          | 3.21   | 12.52 | 2.79  | 26.10  | >32        | >32     |
|                                                            | <i>M-131</i>     | 2.59         | 2.59   | 2.56  | >32   | 13.90  | >32        | >32     |
|                                                            | <i>M-133</i>     | 1.98         | 2.34   | 13.77 | 15.36 | >32    | >32        | >32     |
|                                                            | <i>M-234</i>     | 1.69         | 1.31   | 13.49 | 22.01 | >32    | >32        | >32     |
|                                                            | <i>M-242</i>     | 1.70         | 3.27   | 13.32 | 14.66 | >32    | >32        | >32     |
| <i>M. fortuitum</i>                                        | <i>M-274</i>     | 0.75         | 0.61   | 13.23 | 15.20 | 3.78   | >32        | >32     |
|                                                            | <i>Reference</i> | 27.98        | 0.74   | 12.64 | 1.71  | 0.23   | >32        | 0.008   |
|                                                            | <i>XA99</i>      | 1.70         | <0.016 | 1.80  | 0.40  | <0.016 | >32        | <0.016  |
